# Supplementary material for: Room temperature sol–gel synthesis of crystalline Cs[V3O8]. Probing the hydration level of the interlamellar space by 51V and 133Cs MAS NMR spectroscopy
Source: Royal Society of Chemistry journal article supplement (doi:10.1039/b804397c), 2008-01-01
Supplement: b804397c.pdf [file b804397c.pdf]

**Supplementray data for**

**Room temperature sol-gel synthesis of crystalline Cs[V<sub>3</sub>O<sub>8</sub>]. Probing the  
hydration level of the interlamellar space by <sup>51</sup>V and <sup>133</sup>Cs MAS NMR  
spectroscopy.**

Olivier Durupthy, Jocelyne Maquet, Nathalie Steunou,\* Christian Bonhomme,\*

Thibaud Coradin and Jacques Livage.

Lab Chimie de la Matière Condensée de Paris, UMR CNRS 7574, UPMC Univ. Paris 06,  
Collège de France, E-mail: [nathalie.steunou@upmc.fr](mailto:nathalie.steunou@upmc.fr) and [christian.bonhomme@upmc.fr](mailto:christian.bonhomme@upmc.fr).  
Fax: 00-33-1-44-27-47-69

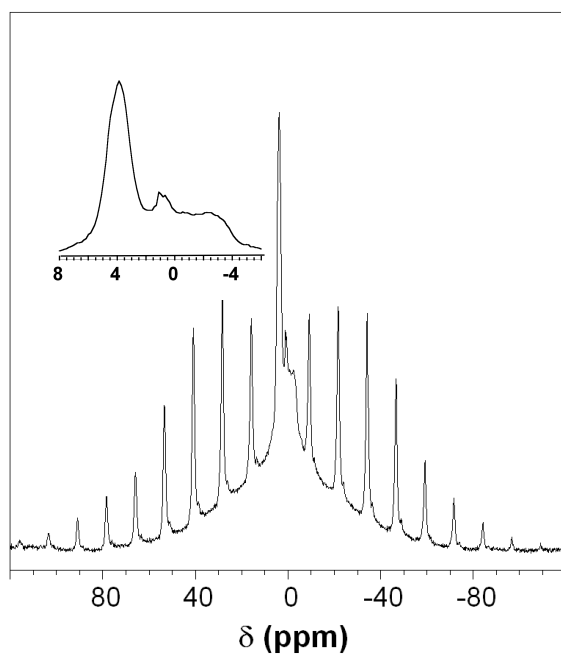

**Figure S1:**  $^1\text{H}$  MAS NMR spectrum of the  $\text{Cs}_2[\text{V}_6\text{O}_{16}] \cdot 0.7\text{H}_2\text{O}$  (YOP) spun at 14 kHz and with 4 transients.

### Determination of NMR parameters from the SORGE (Second-Order Graphic Extrapolation) diagram <sup>52</sup>

The NMR parameters for the type 3 site were further characterized by using the centre of gravity of the various <sup>51</sup>V transitions. The  $\delta_{iso}$  and  $\nu_Q(\eta_Q)$  values were safely determined by using the so-called Second-Order Graphic Extrapolation or SORGE diagram.  $\nu_Q(\eta_Q)$

corresponds to  $\nu_Q \left(1 + \frac{\eta_Q^2}{3}\right)^{1/2}$  with  $\nu_Q = \frac{3}{2I(2I-1)} C_Q$ . It can be shown that the centre of gravity of the various transitions  $\langle \pm m, \pm m-1 \rangle$ ,  $\delta_{CG}^{\langle m \rangle}$ ,  $\delta_{iso}$  and  $\nu_Q(\eta_Q)$  can be related by the following equation:

$$\delta_{CG}^{\langle m \rangle} = \delta_{iso} - [\nu_Q(\eta_Q)]^2 \frac{[I(I+1) - 3 - 9m(m-1)]10^6}{30\nu_0^2}$$

The experimental values of  $\delta_{CG}^{\langle m \rangle}$  for  $m = 1/2, 3/2, 5/2$  and  $7/2$  are plotted versus  $\frac{[I(I+1) - 3 - 9m(m-1)]10^6}{30\nu_0^2}$ . The slope gives  $[\nu_Q(\eta_Q)]^2$  and for “an infinite field”, one derives  $\delta_{iso}$ .

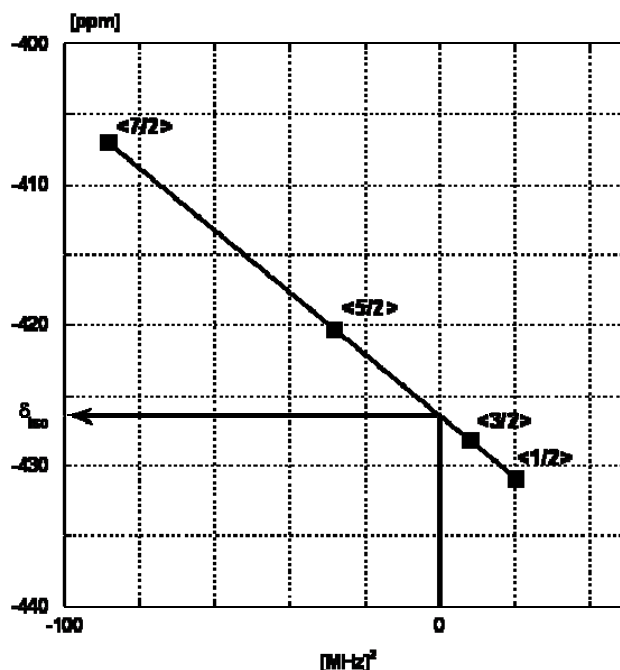

SORGE diagram

<sup>52</sup> D. Massiot, D. Müller, T. Hubert, M. Schneider, A. P. M. Kentgens, B. Coté, J. P. Coutures, W. Gessner, *Solid State Nucl. Magn. Reson.* **1995**, 5, 175-180.
